# Supplementary material for: Adsorption properties of pyridylphenylene dendrimers
Source: Royal Society of Chemistry journal article supplement (doi:10.1039/c6ra27064f), 2017-01-01
Supplement: c6ra27064f1.pdf [file c6ra27064f1.pdf]

## Supplementary information

SEM photographs of polypyridylphenylene dendrimers.

G1 – first generation

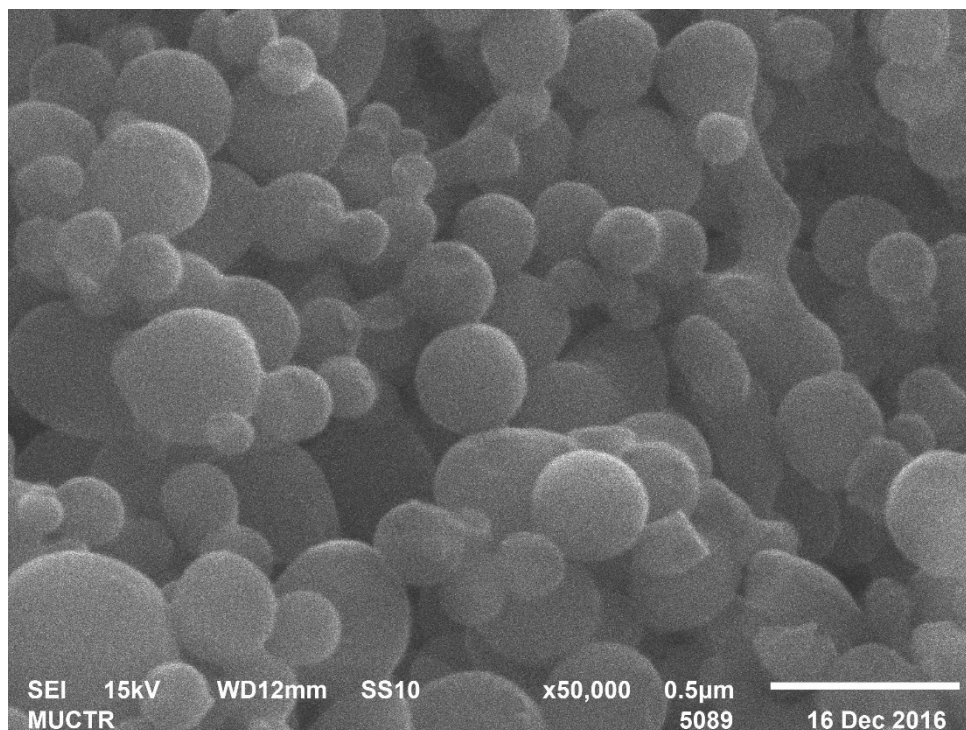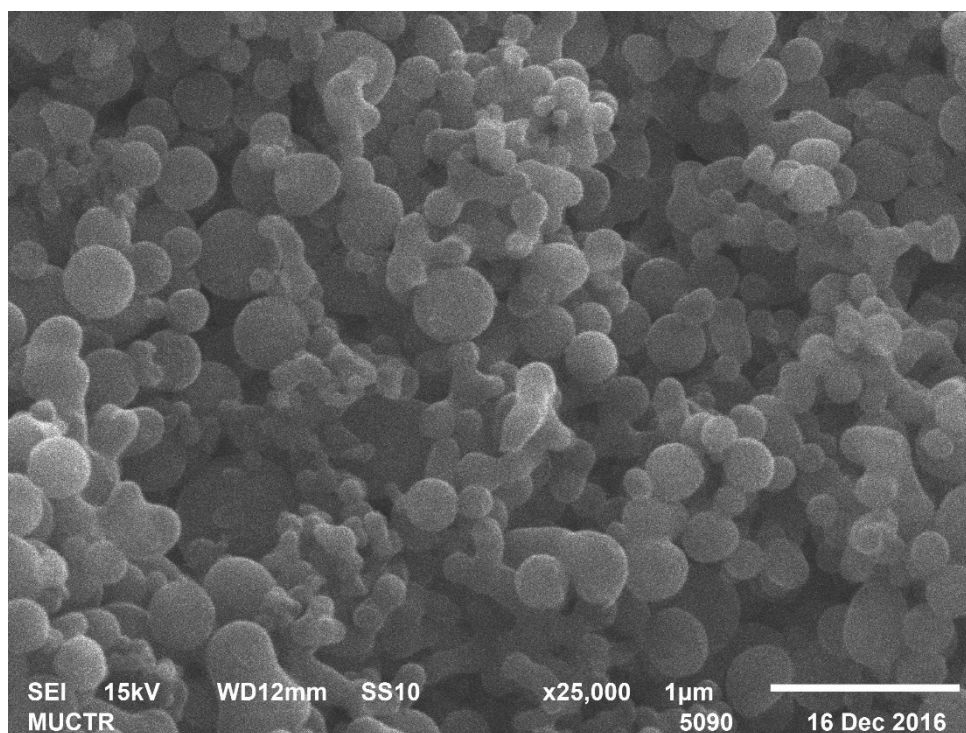

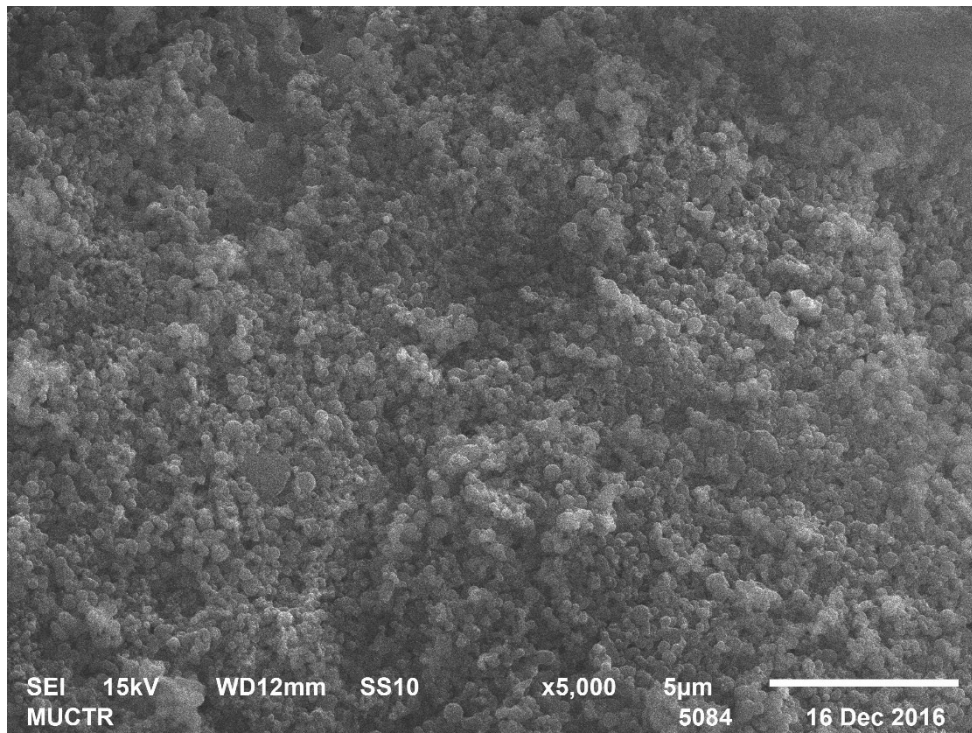

G2 – second generation

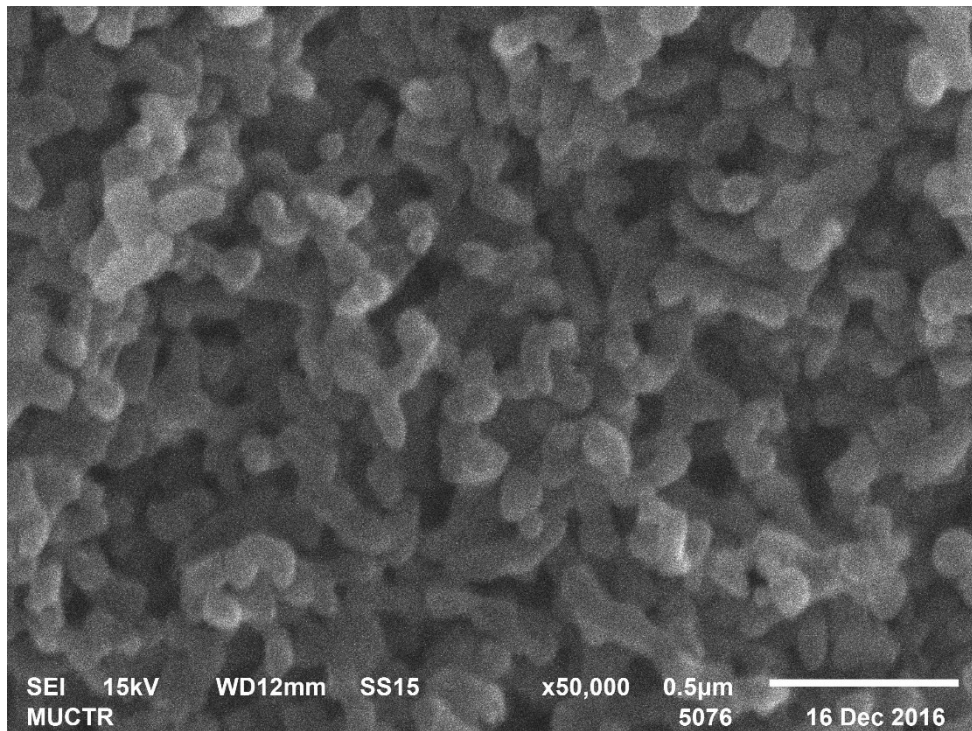

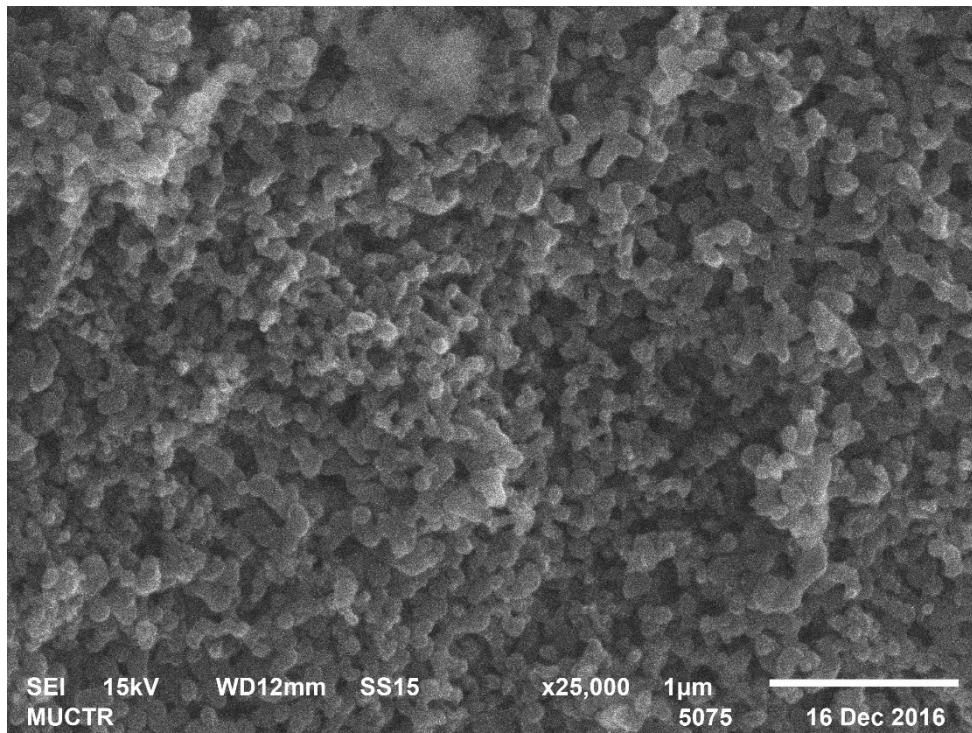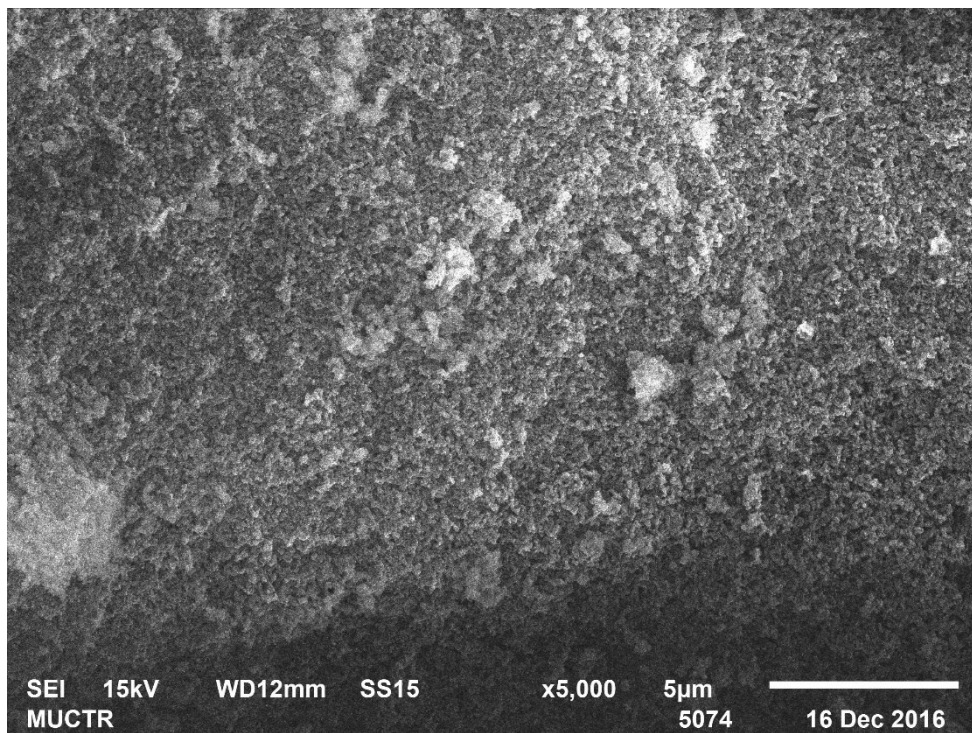

G3 – third generation

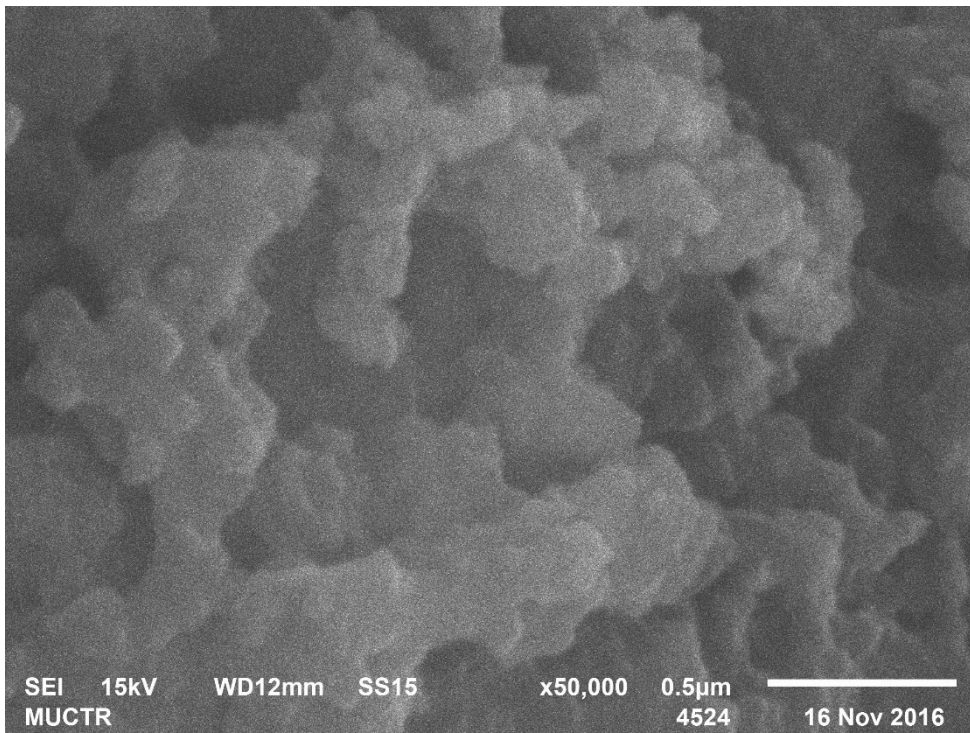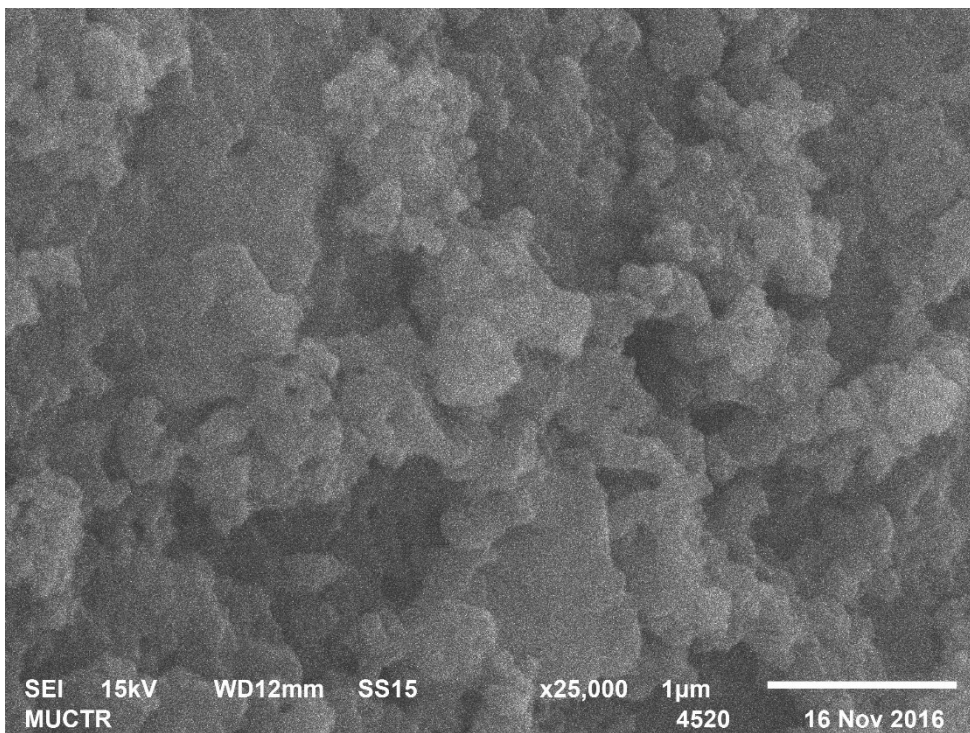



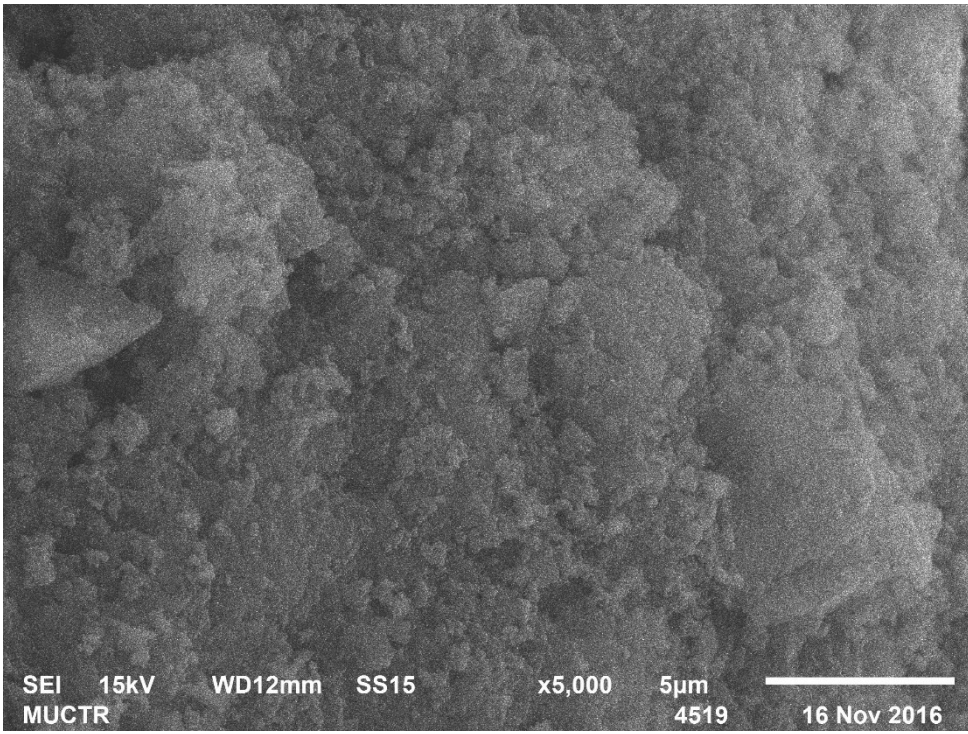

SEI 15kV  
MUCTR

WD12mm

SS15

x5,000

5µm  
4519

16 Nov 2016
